# Supplementary material for: Investigating oxalate biosynthesis in the wood-decaying fungus Gloeophyllum trabeum using 13C metabolic flux analysis
Source: Royal Society of Chemistry journal article supplement (doi:10.1039/c5ra19203j), 2015-01-01
Supplement: c5ra19203j1.pdf [file c5ra19203j1.pdf]

## Supplemental materials

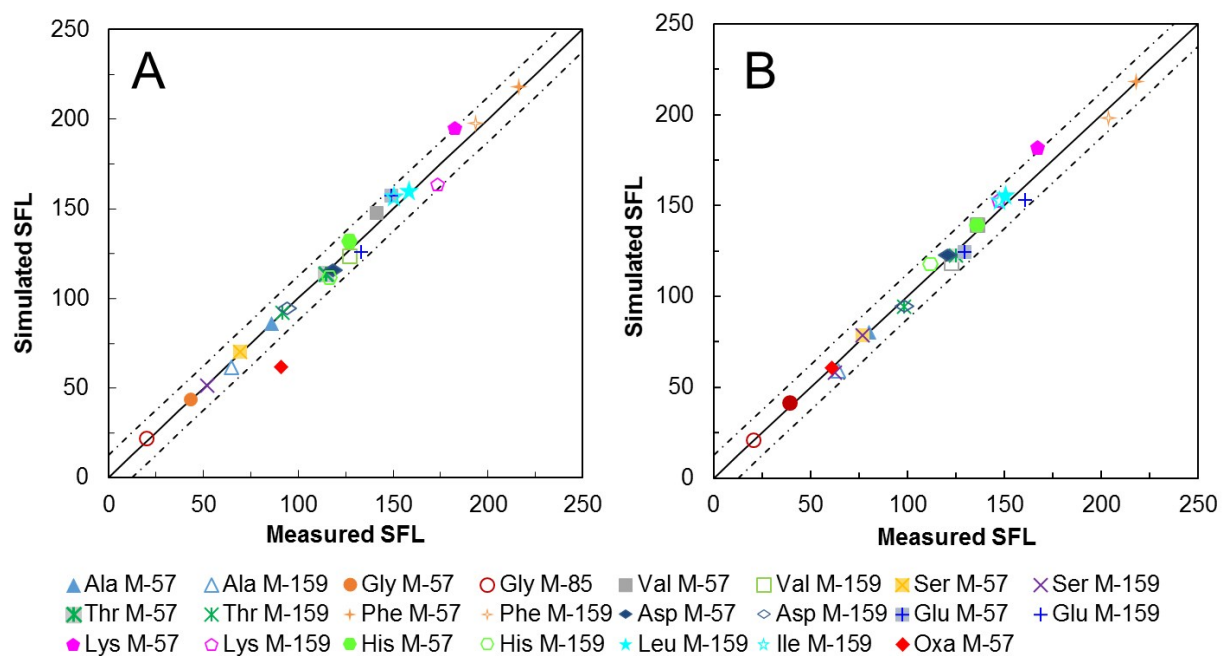

**Figure. S1** Simulated isotopic labeled pattern fitting based on SFL calculation. (A) Low nitrogen condition (LN); (B) High nitrogen condition (HN)

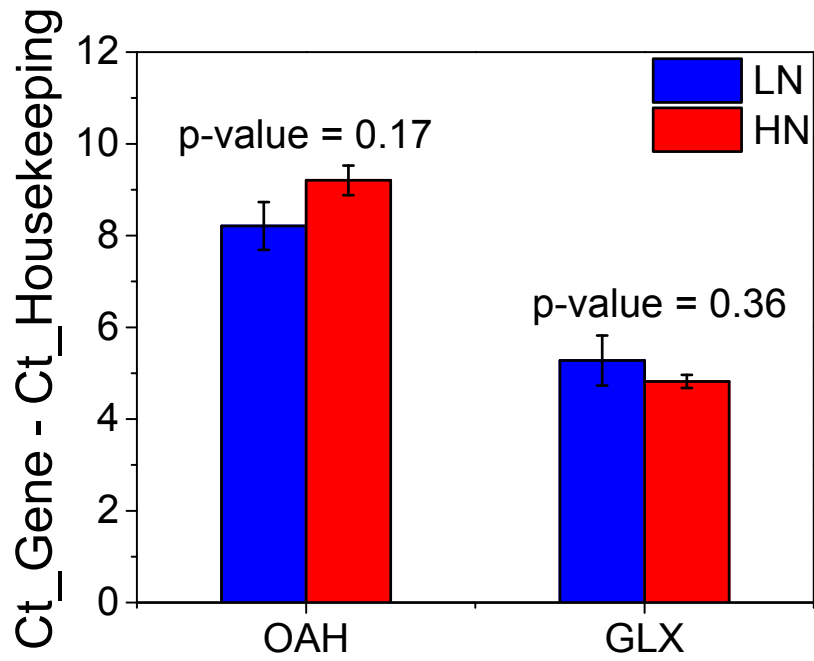

**Figure. S2** qPCR results ( $\Delta$ Ct, defined as the difference between Ct of target gene, i.e., Ct\_Gene and Ct of housekeeping gene, i.e., Ct\_Housekeeping) for genes encoding cytosolic oxaloacetate acetylhydrolase (OAH) and peroxisomal glyoxylate dehydrogenase (GLX) under LN and HN conditions.

**Table S1.** Metabolic flux distribution and central metabolic model.

| No. | Reactions                     | Relative flux (LN) | <sup>a</sup> STDEV | Relative flux (HN) | <sup>a</sup> STDEV |
|-----|-------------------------------|--------------------|--------------------|--------------------|--------------------|
| 1   | GLC <-> G6P                   | 100.0              | 0.0                | 100.0              | 0.0                |
| 2   | G6P <-> F6P                   | 36.7               | 2.2                | 41.5               | 0.8                |
| 3   | F6P <-> DHAP + G3P            | 76.6               | 1.3                | 79.3               | 1.5                |
| 4   | DHAP <-> G3P                  | 76.6               | 1.3                | 79.3               | 1.5                |
| 5   | G3P <-> PEP                   | 167.3              | 0.1                | 163.3              | 0.1                |
| 6   | PEP <-> PYRCYT                | 166.6              | 0.9                | 160.8              | 2.0                |
| 7   | G6P <-> CO2 + P5P             | 60.1               | 5.3                | 56.7               | 0.9                |
| 8   | P5P + P5P <-> S7P + G3P       | 20.0               | 1.7                | 18.9               | 0.3                |
| 9   | S7P + G3P <-> F6P + E4P       | 20.0               | 1.7                | 18.9               | 0.3                |
| 10  | P5P + E4P <-> F6P + G3P       | 19.9               | 1.8                | 18.9               | 0.3                |
| 11  | PYRCYT <-> ACA + CO2          | 14.9               | 8.2                | 0.0                | 0.0                |
| 12  | ACA <-> ETH                   | 0.0                | 0.0                | 0.0                | 0.0                |
| 13  | ACA <-> ACE                   | 24.9               | 8.2                | 0.1                | 0.1                |
| 14  | OAACYT <-> OXA + ACE          | 0.1                | 0.0                | 9.0                | 0.8                |
| 15  | G3P <-> GLYC                  | 5.5                | 4.3                | 1.8                | 0.1                |
| 16  | ACE <-> ACCOACYT              | 24.7               | 8.0                | 0.0                | 0.0                |
| 17  | PYRCYT + CO2 <-> OAACYT       | 96.4               | 7.3                | 52.8               | 0.9                |
| 18  | PYRMIT <-> ACCOAMIT + CO2     | 98.8               | 5.3                | 125.8              | 0.5                |
| 19  | OAAMIT + ACCOAMIT <-> ICIT    | 108.8              | 2.1                | 125.0              | 0.3                |
| 20  | ICIT <-> AKG + CO2            | 99.5               | 2.3                | 124.8              | 0.3                |
| 21  | ICIT <-> GLOX + SUC           | 9.2                | 0.2                | 0.2                | 0.0                |
| 22  | GLOX <-> OXA                  | 9.2                | 0.2                | 0.2                | 0.1                |
| 23  | AKG <-> SUC + CO2             | 89.6               | 2.3                | 114.9              | 0.3                |
| 24  | SUC <-> FUM                   | 98.8               | 2.1                | 115.0              | 0.3                |
| 25  | FUM + FUM <-> OAAMIT + OAAMIT | 50.2               | 0.4                | 121.5              | 4.9                |
| 26  | OAAMIT <-> FUM                | 1.6                | 1.3                | 127.9              | 10.1               |
| 27  | GLOX + ACCOAMIT <-> OAAMIT    | 0.1                | 0.0                | 0.0                | 0.0                |
| 28  | OAAMIT <-> OAACYT             | -68.9              | 9.5                | -28.3              | 0.1                |
| 29  | ACCOACYT <-> ACCOAMIT         | 19.8               | 3.2                | 0.0                | 0.0                |
| 30  | PYRCYT <-> PYRMIT             | 49.6               | 4.2                | 108.0              | 1.1                |
| 31  | G3P <-> SER                   | 0.0                | 0.0                | 11.8               | 2.5                |
| 32  | SER <-> GLY + C1              | 0.0                | 0.0                | 9.5                | 0.2                |
| 33  | OAACYT <-> THR                | 19.9               | 0.0                | 6.2                | 0.4                |
| 34  | THR <-> GLY + ACA             | 10.0               | 0.0                | 0.1                | 0.1                |
| 35  | OAAMIT <-> PYRMIT + CO2       | 59.1               | 9.5                | 18.3               | 0.2                |
| 36  | G6P <-> G6POUT                | 3.2                | 3.1                | 1.8                | 1.8                |
| 37  | P5P <-> P5POUT                | 0.2                | 0.2                | 0.0                | 0.0                |
| 38  | E4P <-> E4POUT                | 0.1                | 0.1                | 0.0                | 0.0                |
| 39  | G3P <-> G3POUT                | 0.2                | 0.2                | 0.6                | 0.5                |
| 40  | PEP <-> PEPOUT                | 0.8                | 0.7                | 2.5                | 1.9                |
| 41  | PYRMIT <-> PYRMITOUT          | 9.9                | 0.0                | 0.5                | 0.5                |

|    |                          |       |     |       |     |
|----|--------------------------|-------|-----|-------|-----|
| 42 | PYRCYT <-> PYRCYTOUT     | 5.6   | 4.3 | 0.0   | 0.0 |
| 43 | OAACYT <-> OAACYTOUT     | 7.5   | 2.1 | 9.3   | 0.7 |
| 44 | AKG <-> AKGOUT           | 9.9   | 0.0 | 10.0  | 0.0 |
| 45 | ACCOACYT <-> ACCOACYTOUT | 4.8   | 4.8 | 0.0   | 0.0 |
| 46 | ACCOAMIT <-> ACCOAMITOUT | 9.8   | 0.1 | 0.8   | 0.7 |
| 47 | SER <-> SEROUT           | 0.0   | 0.0 | 2.3   | 2.3 |
| 48 | GLY <-> GLYOUT           | 10.0  | 0.0 | 9.6   | 0.2 |
| 49 | C1 <-> C1OUT             | 0.0   | 0.0 | 9.5   | 0.2 |
| 50 | THR <-> THROUT           | 9.9   | 0.0 | 6.1   | 0.5 |
| 51 | ETH <-> ETHOUT           | 0.0   | 0.0 | 0.0   | 0.0 |
| 52 | ACE <-> ACEOUT           | 0.3   | 0.3 | 9.1   | 0.8 |
| 53 | GLYC <-> GLYCOUT         | 5.5   | 4.3 | 1.8   | 0.1 |
| 54 | CO2 <-> CO2OUT           | 325.6 | 1.5 | 387.7 | 0.2 |
| 55 | OXA <-> OXAOUT           | 9.3   | 0.2 | 9.2   | 0.8 |

---

<sup>a</sup> Standard deviation

## BLAST results of oxalate biosynthesis enzymes in *G. trabeum*

**Table S2.** BLAST results of *G. trabeum* from *Fomitopsis palustris*

| Enzyme                               | Score         | Expected | Identities    | Gaps        | Strand    |
|--------------------------------------|---------------|----------|---------------|-------------|-----------|
| Oxaloacetate acetylhydrolase (fpOAH) | 722 bits(800) | 0.0      | 711/918(77%)  | 0/918(0%)   | Plus/Plus |
| Glyoxylate dehydrogenase (fpGLOXDH1) | 385 bits(426) | 2e-106   | 920/1373(67%) | 45/1373(3%) | Plus/Plus |

>gi|472338812|dbj|AB690578.1| Fomitopsis palustris FpOAH mRNA for oxaloacetate acetylhydrolase, complete cds

Gloeophyllum trabeum ATCC 11539 Phosphoenolpyruvate/pyruvate domain-containing protein partial mRNA

Sequence ID: ref|XM\_007867946.1| Length: 1008 Number of Matches: 1

>gi|225636765|dbj|AB079662.1| Fomitopsis palustris FPGLOXDH1 mRNA for glyoxylate dehydrogenase, complete cds

Gloeophyllum trabeum ATCC 11539 hypothetical protein mRNA

Sequence ID: ref|XM\_007868156.1| Length: 1750 Number of Matches: 1
